# Supplementary material
Source: PubMed Central journal article supplement (PMC4636032)

## Supplemental Figures.

**Figure S1:** Effect of interventions on percent change in weight from baseline to 24 months. Figure shows model-based estimates from linear mixed model analyses.

Abbreviations: CP, Cell Phone Intervention; PC, Personal Coaching Intervention; CI, Confidence Interval.

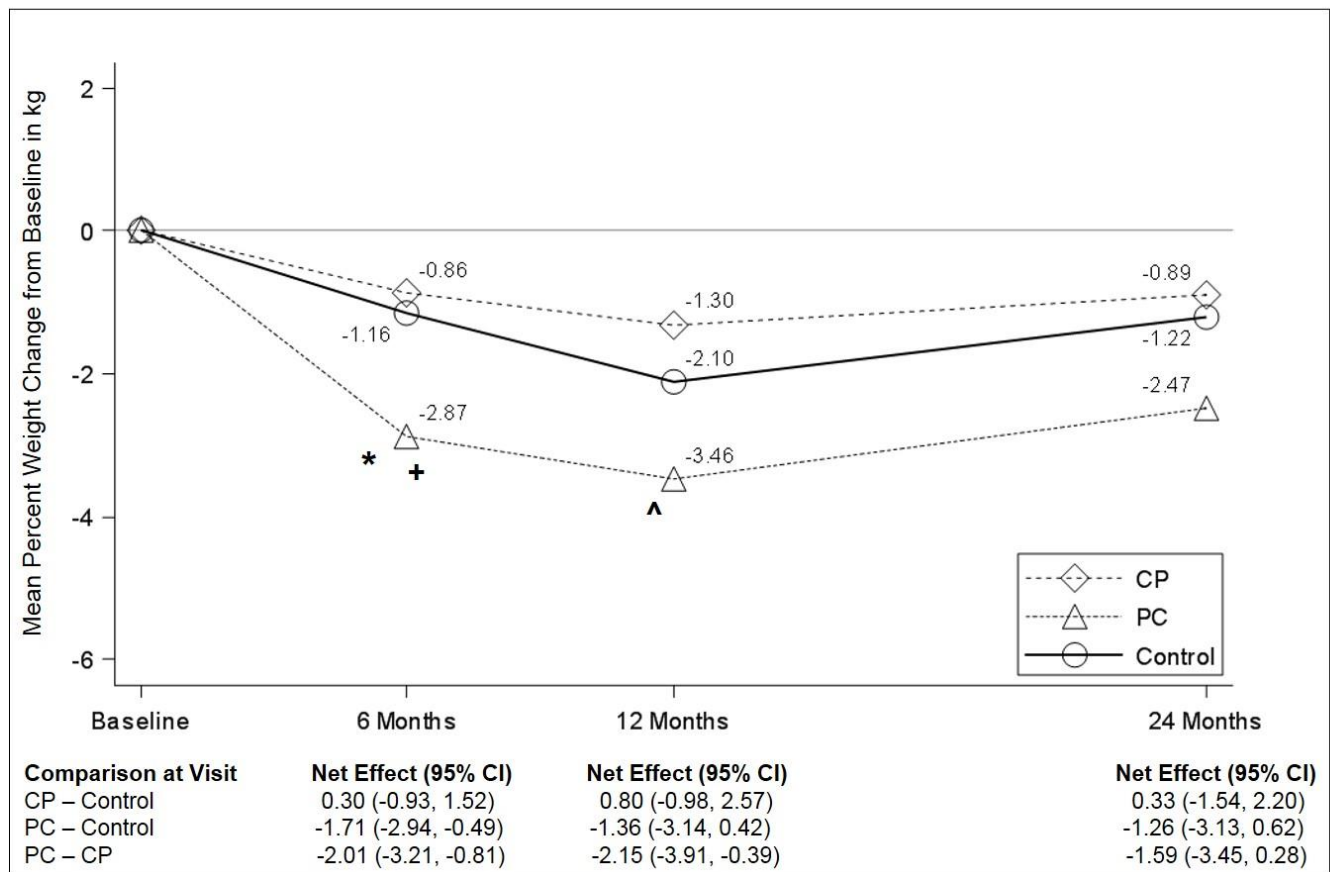

\* p-value = 0.006 for the comparison between PC and control at 6 months.

+ p-value = 0.001 for the comparison between PC and CP at 6 months.

^ p-value = 0.017 for the comparison between PC and CP at 12 months

**Figure S2:** Effect of interventions on Health Eating Index (HEI) in kcal/wk from baseline to 24 months.

Figure shows model-based estimates from linear mixed model analyses.

Abbreviations: CP, Cell Phone Intervention; PC, Personal Coaching Intervention; CI, Confidence Interval.

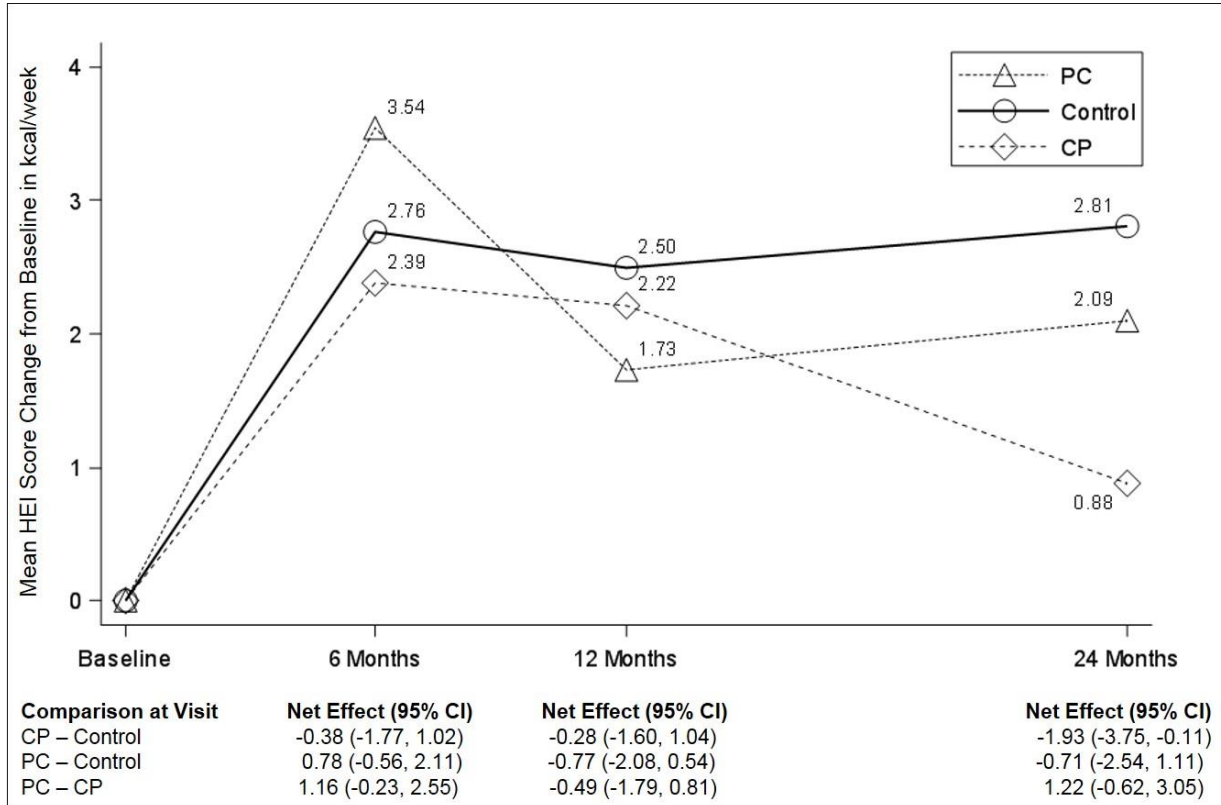

**Figure S3:** Effect of interventions on Leisure Time Physical Activity in kcal/wk from baseline to 24 months. Figure shows model-based estimates from linear mixed model analyses.

Abbreviations: CP, Cell Phone Intervention; PC, Personal Coaching Intervention; CI, Confidence Interval.

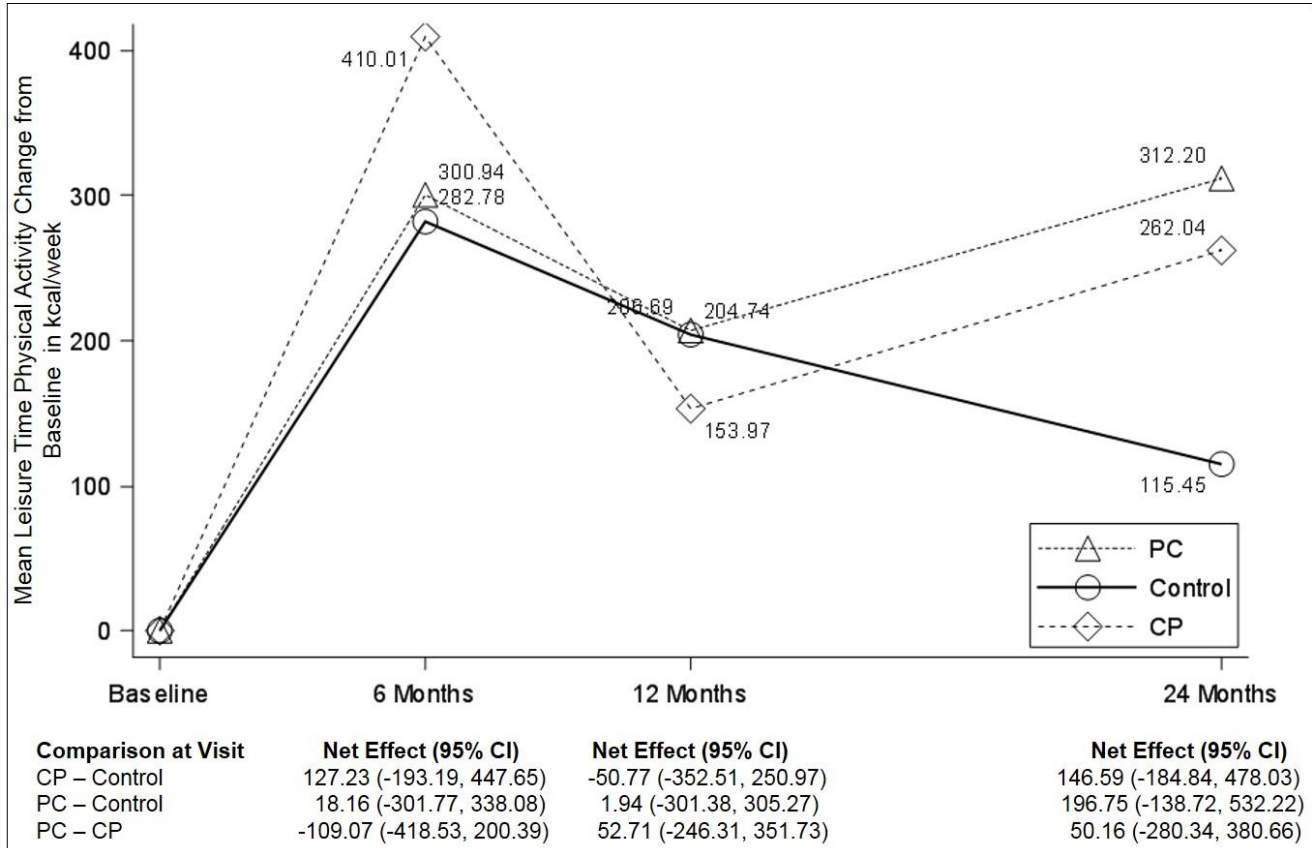

Supplement: NIHMS704607-supplement-supplement_1.pdf [file NIHMS704607-supplement-supplement_1.pdf]
